# Supplementary material
Source: ML conference proceedings conference paper supplement (https://openreview.net/forum?id=3Huw3pa8TR)
Supplement: supplementary_material [file attachment]

---

# Supplementary material for Enhancing extrapolation in Materials Science through Contrastive Learning of Chemical Compositions

---

Anonymous Author(s)

Affiliation

Address

email

## 1 A Datasets

2 In table 1 we report a summary of different datasets of chemical properties examined in this study.  
3 The stated dataset sizes correspond to the application of the preprocessing steps outlined in the main paper.

Table 1: Utilized datasets to benchmark the proposed approach.

| Dataset name | Property                          | units           | size | original source |
|--------------|-----------------------------------|-----------------|------|-----------------|
| seebeck      | Seebeck coefficient               | $\mu\text{V/K}$ | 403  | UCSB            |
| kappa        | Thermal conductivity              | W/mK (log10)    | 319  | UCSB            |
| tcongrmelt   | Temperature for congruent melting | K               | 3674 | MPDS            |
| elecmass     | Effective mass of electrons       | $m_0$ (log10)   | 320  | MPDS            |
| bmodulus     | Bulk modulus                      | GPa             | 1432 | MPDS            |
| smodulus     | Shear modulus                     | GPa             | 317  | MPDS            |
| bandgap      | Band gap                          | eV              | 2728 | MPDS            |

4

## 5 B Implementation details

6 All neural network-based models have been implemented utilizing PyTorch [1] and PyTorch Geometric [2]. CombNet’s encoder module is configured with 128 input channels, 256 hidden channels, and  
7 256 output channels, employing 3 message-passing layers. The projection head  $\text{MLP}_{\text{proj}}$  is designed  
8 as a single-layer MLP with a hidden dimension set to 512. The separate  $\text{MLP}_{\text{pred}}$  model, employed both  
9 as baseline and for fine-tuning contrastive-learned representations, adopts hidden dimensions [512,  
10 256, 128, 64]. All neural networks utilize ReLU as activation function. CrabNet model is utilized  
11 with its default settings, while Ridge and SVR are implemented using the sci-kit learn package [3],  
12 also with default settings.  
13

## 14 References

- 15 [1] Pytorch: An imperative style, high-performance deep learning library, 2019.  
16 [2] Matthias Fey and Jan E. Lenssen. Fast graph representation learning with PyTorch Geometric. In  
17 *ICLR Workshop on Representation Learning on Graphs and Manifolds*, 2019.

- 18 [3] F. Pedregosa, G. Varoquaux, A. Gramfort, V. Michel, B. Thirion, O. Grisel, M. Blondel, P. Pret-  
19 tenhofer, R. Weiss, V. Dubourg, J. Vanderplas, A. Passos, D. Cournapeau, M. Brucher, M. Perrot,  
20 and E. Duchesnay. Scikit-learn: Machine learning in Python. *Journal of Machine Learning*  
21 *Research*, 2011.
